# Supplementary material for: BRAF V600E Mutant Colorectal Cancer Subtypes Based on Gene Expression
Source: Oxford University Press journal article supplement (doi:10.1158/1078-0432.ccr-16-0140), 2016-06-29
Supplement: 10780432ccr160140-sup-161056_1_supp_3477676_56n7hn.xlsx [file 10780432ccr160140-sup-161056_1_supp_3477676_56n7hn.xlsx]

## Sheet: Table S4
Table S4. List of genes that are specific for BRAF mutant subtypes, MSI status and gender
Legend
Tables displaying the list of genes that are specific for BRAF mutant subtypes, MSI status and gender after a multivariable linear regression. Each clinical factor is displayed in a separate spreadsheet. Each spreadsheet displays, for each gene, the coefficient, t-statistics and p-values in the multivariable regression. Genes were ordered with the ones at the top being the most associated with th…
BM subtype					MSI status					Gender
Gene Symbol	Coefficient	t-statistics	p-value		Gene Symbol	Coefficient	t-statistics	p-value		Gene Symbol	Coefficient	t-statistics	p-value
PRICKLE1	-1.22262	-11.291	1.07551e-22		MLH1	1.41362	10.9277	1.20162e-21		DDX3Y	3.83182	24.1017	3.06942e-58
EGR2	-1.20479	-10.9432	1.08419e-21		EPM2AIP1	1.32258	10.1961	1.47653e-19		RPS4Y1	4.75669	23.6903	3.2515e-57
COL8A2	-1.22206	-10.5223	1.74346e-20		LYG1	-0.899919	-9.34927	3.47085e-17		EIF1AY	2.52483	11.5208	2.32329e-23
LTBP2	-1.25458	-10.4961	2.07175e-20		FDXR	-0.852237	-8.04174	1.14437e-13		EIF1AX	-0.831264	-8.2209	3.8827e-14
COL8A1	-1.53591	-10.4572	2.67411e-20		TGFBR2	1.04074	7.70146	8.65561e-13		ZFX	-0.52832	-6.56874	5.27425e-10
PTGIS	-1.50747	-10.2496	1.04142e-19		GNLY	-1.27986	-7.61864	1.40752e-12		PRKX	-0.807344	-6.4668	9.13771e-10
BOC	-1.24801	-10.2365	1.13416e-19		TBXAS1	0.977348	7.48616	3.04773e-12		PRKY	0.702552	6.1647	4.52034e-09
HTRA1	-1.15415	-10.2298	1.18509e-19		SECTM1	-1.08331	-7.10275	2.74281e-11		SMC1A	-0.488074	-6.07675	7.13764e-09
CMTM3	-1.05291	-10.1965	1.47265e-19		NUBPL	0.7856	7.01132	4.59096e-11
FBXL7	-0.973565	-9.88065	1.14625e-18		E2F7	-0.76951	-6.99382	5.06439e-11
BASP1	-1.11177	-9.84895	1.40712e-18		CAB39L	0.805717	6.95829	6.17931e-11
HOPX	-1.18808	-9.83979	1.49287e-18		EIF5A	-1.22144	-6.88785	9.15159e-11
RUNX1T1	-0.989307	-9.59802	7.08215e-18		SLC25A22	-0.46102	-6.68684	2.77338e-10
MXRA8	-1.00566	-9.5784	8.0314e-18		ASPHD2	-0.776327	-6.50859	7.29894e-10
HLX	-0.687189	-9.50822	1.25896e-17		KIAA1967	-0.620689	-6.50757	7.33899e-10
CLIP3	-0.885744	-9.30103	4.71664e-17		CADPS	1.24969	6.506	7.40144e-10
TSHZ3	-0.863799	-9.19391	9.30201e-17		TXNDC9	0.656034	6.46938	9.01176e-10
PLEKHO2	-0.665706	-9.03476	2.53874e-16		GZMA	-1.16612	-6.35982	1.6179e-09
GLI3	-1.03056	-9.01621	2.85288e-16		E2F2	-0.493938	-6.32705	1.92523e-09
FBLN1	-1.41323	-8.97057	3.79958e-16		GAS2L1	-0.637571	-6.28551	2.39812e-09
TGFB3	-1.11558	-8.93303	4.8079e-16		DMD	1.17673	6.27174	2.57873e-09
GPX7	-0.904748	-8.93164	4.84987e-16		PHOSPHO2	0.685235	6.27015	2.60044e-09
CCDC80	-1.45231	-8.91847	5.26666e-16		ABCB1	1.06682	6.19289	3.90143e-09
COL6A2	-1.16831	-8.88261	6.59141e-16		RAD9A	-0.394036	-6.05962	7.79827e-09
TNS1	-1.34695	-8.88115	6.65177e-16		APOL2	-0.793589	-6.05696	7.90606e-09
AKAP12	-1.50746	-8.79846	1.11438e-15		TYMP	-0.898977	-5.99412	1.09235e-08
GGT5	-0.842953	-8.77382	1.29915e-15		CENPM	-0.600314	-5.99223	1.10297e-08
FXYD6	-1.07594	-8.71683	1.85128e-15		ELF1	0.752905	5.95117	1.36074e-08
ID4	-1.08746	-8.63683	3.03919e-15		PBX1	1.0578	5.9415	1.42962e-08
NDN	-0.913822	-8.61423	3.49478e-15		SEMA5A	0.914568	5.91963	1.59805e-08
GYPC	-0.805639	-8.61183	3.54707e-15		ITCH	0.640814	5.91634	1.625e-08
SERPINF1	-1.09105	-8.58353	4.22422e-15		FANCD2	-0.738291	-5.91063	1.67292e-08
DACT3	-1.03839	-8.55934	4.904e-15		RGS5	1.04767	5.88923	1.86493e-08
MAGEH1	-0.780109	-8.51385	6.48899e-15		WHSC1	-0.600023	-5.85824	2.18178e-08
SPOCK1	-1.29735	-8.50895	6.68769e-15		AXIN2	0.852091	5.83097	2.5037e-08
RERG	-0.797716	-8.48981	7.52215e-15		FRZB	1.00591	5.82746	2.54841e-08
CTSF	-0.622588	-8.46917	8.53867e-15		PARD3	1.15957	5.82216	2.61736e-08
COLEC12	-1.409	-8.4611	8.9722e-15		SEMA3C	1.1654	5.80669	2.82915e-08
SLC24A3	-0.916201	-8.45237	9.46596e-15		PRF1	-0.701365	-5.79992	2.92703e-08
RGL1	-0.727475	-8.45141	9.52197e-15		TACC3	-0.47325	-5.79595	2.98603e-08
SFRP2	-2.00162	-8.4224	1.13742e-14		SRP19	-0.427248	-5.79532	2.99551e-08
ARHGEF17	-0.644729	-8.41073	1.22164e-14		TRMT12	0.723654	5.78095	3.21938e-08
PLEKHO1	-0.859278	-8.32961	2.00511e-14		MYO7A	-0.572326	-5.77822	3.26365e-08
MRAS	-0.679044	-8.31915	2.137e-14		NEK3	0.681851	5.76703	3.45189e-08
FGFR1	-0.826681	-8.29936	2.41075e-14		CYP2B6	1.11068	5.76556	3.47735e-08
RFTN1	-0.824105	-8.29682	2.44828e-14		PRKACB	1.04536	5.75026	3.7537e-08
MAN1C1	-1.07488	-8.2799	2.71361e-14		UAP1L1	-0.818231	-5.71608	4.45117e-08
SERPING1	-1.21171	-8.2668	2.93863e-14		GSTA4	0.631165	5.69313	4.98906e-08
CLDN5	-0.67798	-8.25439	3.16872e-14
GPR124	-0.737837	-8.22907	3.69501e-14
MSRB3	-1.23705	-8.22192	3.85877e-14
AMOTL1	-0.98642	-8.20778	4.20398e-14
HIC1	-0.736583	-8.18977	4.68837e-14
GPR68	-0.74659	-8.16199	5.54601e-14
PDLIM4	-0.942317	-8.14295	6.22169e-14
DPYSL3	-1.22349	-8.12965	6.74189e-14
DOK5	-0.66296	-8.12225	7.04968e-14
C16orf45	-0.664792	-8.08877	8.62519e-14
GAS7	-0.857666	-8.06543	9.92518e-14
TWIST1	-1.06659	-8.05883	1.03271e-13
LOXL1	-0.970971	-8.02375	1.27479e-13
PIK3CD	-0.807659	-8.01405	1.35113e-13
SLIT3	-0.99597	-7.96003	1.86696e-13
CHST11	-1.01882	-7.95746	1.89589e-13
ZWINT	0.812103	7.95321	1.94459e-13
TM6SF1	-0.941634	-7.95165	1.96289e-13
HEYL	-0.900179	-7.94087	2.09341e-13
PDE2A	-0.883922	-7.9363	2.15131e-13
COPZ2	-0.739658	-7.92796	2.261e-13
C1R	-1.18206	-7.92696	2.27455e-13
EBP	0.727501	7.91679	2.41678e-13
SFRP4	-1.78039	-7.90663	2.56772e-13
COL6A1	-0.890448	-7.89165	2.80728e-13
ANTXR1	-1.2796	-7.87881	3.03026e-13
LMO2	-0.542187	-7.8773	3.0575e-13
HSPB8	-0.877422	-7.87335	3.13017e-13
OLFML3	-0.948508	-7.85767	3.43606e-13
MITF	-0.965062	-7.85148	3.56487e-13
ITGBL1	-1.19837	-7.82696	4.12323e-13
RAD51	0.626649	7.81411	4.44951e-13
GFPT2	-1.00419	-7.80573	4.67604e-13
SLFN11	-0.990138	-7.79981	4.84304e-13
VASN	-0.610402	-7.7925	5.05731e-13
KIF11	1.07954	7.78091	5.41599e-13
RRM1	0.723356	7.78054	5.42804e-13
RARRES2	-0.90306	-7.77706	5.54073e-13
FBLN5	-0.850712	-7.76577	5.92333e-13
BGN	-0.997403	-7.75595	6.27703e-13
LHFP	-0.877083	-7.71895	7.8084e-13
EFS	-0.754511	-7.71478	8.00256e-13
TRPS1	-0.855114	-7.69364	9.06328e-13
ALDH1A3	-1.13318	-7.69206	9.14763e-13
NR3C1	-0.911016	-7.66982	1.04255e-12
CLIP4	-0.86212	-7.66959	1.04396e-12
MAF	-1.03404	-7.667	1.05994e-12
FBLN2	-1.03288	-7.65618	1.12951e-12
GLT8D2	-1.0036	-7.65083	1.16552e-12
DPT	-1.22391	-7.65019	1.16988e-12
OLFML2B	-0.768334	-7.63846	1.25324e-12
SPG20	-0.782071	-7.60942	1.48563e-12
F13A1	-1.18843	-7.60804	1.49766e-12
NGFR	-0.907994	-7.60467	1.52752e-12
COL5A1	-1.05462	-7.59357	1.62997e-12
FZD1	-0.726103	-7.56952	1.87582e-12
LRRC33	-0.536361	-7.56375	1.94004e-12
IGF1	-1.25334	-7.56357	1.94213e-12
AEBP1	-1.09902	-7.54302	2.18944e-12
RGMA	-0.869049	-7.53475	2.29752e-12
ARMCX2	-0.82055	-7.49075	2.96753e-12
MGP	-1.22083	-7.48766	3.02124e-12
LMOD1	-1.34406	-7.48081	3.14384e-12
ATP8B2	-0.894845	-7.47066	3.33449e-12
FGF1	-0.715214	-7.45241	3.70657e-12
MRC2	-0.736831	-7.4303	4.21277e-12
HSPB2	-0.609471	-7.42927	4.23809e-12
TUBB6	-0.82551	-7.42216	4.41591e-12
DCN	-1.35845	-7.40874	4.77186e-12
PDLIM3	-1.22113	-7.37861	5.67806e-12
FAM20A	-0.620577	-7.35422	6.5346e-12
LIMS2	-0.725371	-7.34506	6.88802e-12
TYROBP	-0.890111	-7.34422	6.92162e-12
RAB31	-0.984295	-7.33956	7.10949e-12
IL21R	-0.831191	-7.32851	7.5758e-12
MMP19	-0.689072	-7.32161	7.88187e-12
GAS1	-1.27345	-7.29012	9.44243e-12
RBMS1	-0.918296	-7.27969	1.00234e-11
CYP1B1	-1.2957	-7.26763	1.07397e-11
TAGLN	-1.22666	-7.25895	1.12861e-11
FBN1	-1.06932	-7.25788	1.13558e-11
WISP1	-0.766427	-7.25711	1.14057e-11
CPXM2	-0.914159	-7.25219	1.17306e-11
A2M	-0.943299	-7.25082	1.1823e-11
MFAP4	-0.961755	-7.23829	1.27002e-11
CLDN11	-1.0592	-7.23019	1.3301e-11
KCNE4	-0.769335	-7.22838	1.34392e-11
ACTA2	-1.08076	-7.22791	1.34749e-11
PRAF2	-0.538054	-7.22732	1.35209e-11
ZBTB47	-0.577491	-7.22566	1.36491e-11
STRA6	-0.730632	-7.22385	1.37908e-11
CD4	-0.85608	-7.22379	1.37952e-11
LAIR1	-0.798747	-7.22187	1.39473e-11
TCEA2	-0.666381	-7.22058	1.405e-11
MNDA	-0.824836	-7.21526	1.4483e-11
LAYN	-0.749259	-7.21218	1.47392e-11
H2AFZ	0.574879	7.21192	1.47612e-11
RCSD1	-0.743137	-7.18707	1.70048e-11
JPH2	-0.876465	-7.17791	1.79139e-11
VSIG4	-0.925522	-7.16815	1.89351e-11
LBH	-0.838526	-7.16546	1.92261e-11
ADAMTSL4	-0.735791	-7.14245	2.19082e-11
TCF4	-0.983662	-7.14106	2.20809e-11
E2F8	0.728262	7.13979	2.22403e-11
EFEMP1	-1.27928	-7.13941	2.22888e-11
MYLK	-1.12053	-7.13145	2.33171e-11
RUNX2	-0.886411	-7.12971	2.35478e-11
CXCL12	-1.24595	-7.12504	2.41791e-11
EPB41L3	-0.978705	-7.12375	2.43559e-11
CHRDL1	-1.29848	-7.11357	2.58011e-11
TPD52	0.898142	7.08715	2.99558e-11
SSPN	-0.878848	-7.08678	3.00183e-11
COX7A1	-0.684111	-7.08531	3.02692e-11
SYNE1	-0.747603	-7.08173	3.08861e-11
MAP1B	-0.970598	-7.06708	3.3548e-11
ITGAM	-0.809779	-7.06455	3.40289e-11
SNX18	-0.595686	-7.06153	3.46129e-11
CSF1R	-0.789898	-7.03151	4.09866e-11
CDCA7	0.894613	7.02971	4.14022e-11
JAM2	-1.03583	-7.02571	4.23431e-11
ISLR	-1.04239	-7.0205	4.36009e-11
HTRA3	-0.826949	-7.01634	4.46324e-11
LATS2	-0.805897	-7.01393	4.52418e-11
PRICKLE2	-0.795892	-7.01082	4.60391e-11
PDGFRB	-0.961518	-7.00133	4.8557e-11
DYSF	-0.634855	-6.99951	4.90547e-11
RBMS3	-0.881548	-6.99913	4.91591e-11
MSN	-0.814543	-6.99756	4.95935e-11
ZNF331	-0.85032	-6.98572	5.29971e-11
AOC3	-1.01582	-6.9845	5.33619e-11
MAFB	-0.9238	-6.97648	5.58137e-11
ANK2	-1.0992	-6.97018	5.78144e-11
MYO1F	-0.655285	-6.96691	5.88828e-11
EGR3	-0.724762	-6.95622	6.25097e-11
LAT2	-0.573043	-6.93932	6.87017e-11
MAP7D1	-0.680521	-6.93351	7.09638e-11
ZNF362	-0.557681	-6.93064	7.2109e-11
GADD45B	-0.846002	-6.92986	7.24247e-11
IL1R1	-0.761912	-6.92692	7.36227e-11
LSM3	0.535628	6.9247	7.45388e-11
FRMD4A	-0.675256	-6.92446	7.46402e-11
SPI1	-0.595596	-6.91035	8.07452e-11
GINS2	0.759481	6.90804	8.17938e-11
GIMAP4	-0.813986	-6.88972	9.05708e-11
TSPYL5	-0.68592	-6.88864	9.11186e-11
SULF1	-1.14453	-6.87781	9.67686e-11
SPAG5	0.613023	6.86934	1.0143e-10
MND1	0.754336	6.8692	1.01509e-10
CYR61	-1.12422	-6.86837	1.01981e-10
CLEC14A	-0.552094	-6.86365	1.04686e-10
THBS4	-1.35665	-6.86081	1.0635e-10
ANKRD35	-0.479722	-6.85536	1.09616e-10
TOM1L1	0.747756	6.85365	1.10659e-10
SLAMF8	-0.886531	-6.84989	1.12993e-10
ITGB2	-1.06634	-6.84563	1.15691e-10
WIPF1	-0.964255	-6.83341	1.23791e-10
STARD8	-0.695791	-6.81192	1.39416e-10
AXL	-0.81042	-6.80705	1.43223e-10
SYNPO	-0.713268	-6.80369	1.45904e-10
MRVI1	-0.761024	-6.79359	1.5427e-10
ZNF521	-0.817403	-6.79292	1.54844e-10
DAAM2	-0.569143	-6.79081	1.56658e-10
FOLR2	-0.764947	-6.7846	1.62113e-10
C3	-1.39345	-6.78035	1.65958e-10
C1S	-1.14678	-6.7682	1.7745e-10
AURKA	0.649467	6.75448	1.91365e-10
SLC27A2	0.741079	6.75003	1.96106e-10
MEIS1	-0.902448	-6.7456	2.00938e-10
COL3A1	-1.30612	-6.7425	2.04391e-10
CCDC8	-0.518048	-6.72721	2.22296e-10
ITGA11	-0.760717	-6.71718	2.34878e-10
MAD2L1	0.832127	6.7168	2.35366e-10
MFAP2	-0.935428	-6.71413	2.38839e-10
PNMAL1	-0.756579	-6.69123	2.70756e-10
VCAM1	-1.09483	-6.69096	2.71157e-10
PKP2	0.898573	6.69051	2.71825e-10
EFEMP2	-0.934464	-6.68891	2.74221e-10
PRR11	0.745565	6.68701	2.77074e-10
NRP2	-0.807867	-6.6813	2.85869e-10
C5orf30	0.605473	6.67562	2.94887e-10
JAK3	-0.653308	-6.67532	2.95366e-10
COL16A1	-0.797739	-6.67405	2.97416e-10
PPP1R14A	-0.774628	-6.66657	3.09832e-10
HCLS1	-0.831617	-6.66422	3.13831e-10
MGST2	0.620459	6.65468	3.306e-10
METAP1	0.547378	6.64796	3.42937e-10
MMP2	-1.07194	-6.64098	3.56239e-10
NOTCH3	-0.716686	-6.63699	3.64059e-10
FGD2	-0.668099	-6.63078	3.76582e-10
ANGPTL2	-0.812472	-6.62025	3.98803e-10
EDNRA	-0.781032	-6.61816	4.0336e-10
ADAMTSL3	-0.987581	-6.61305	4.14715e-10
FNBP1	-0.803082	-6.6093	4.23261e-10
PLTP	-0.845292	-6.60765	4.27084e-10
C3AR1	-0.774407	-6.60399	4.35646e-10
CD37	-0.81263	-6.60336	4.37155e-10
GPNMB	-1.14834	-6.59648	4.53795e-10
KIF20A	0.618089	6.59293	4.62605e-10
CCNA2	0.720203	6.59028	4.693e-10
COL1A2	-1.11952	-6.57543	5.08654e-10
RAD51AP1	0.661445	6.57384	5.1306e-10
PCNA	0.747754	6.5724	5.17078e-10
SELM	-0.825549	-6.57225	5.17512e-10
SOCS3	-0.799997	-6.56921	5.26081e-10
NEXN	-1.02934	-6.5648	5.38802e-10
CLEC11A	-0.602335	-6.56323	5.43389e-10
CALD1	-1.03934	-6.56293	5.44298e-10
DLC1	-0.679818	-6.55656	5.63366e-10
TIMP2	-0.852282	-6.53929	6.18493e-10
COX5A	0.525733	6.52875	6.5469e-10
SLC22A17	-0.470433	-6.52207	6.78723e-10
EFHD1	-0.488549	-6.52047	6.84608e-10
CNN1	-1.16775	-6.52011	6.85927e-10
VASH1	-0.574107	-6.51734	6.96281e-10
MRPS35	0.654183	6.51513	7.04589e-10
ZSCAN18	-0.957479	-6.51491	7.05434e-10
NUAK1	-0.787876	-6.50989	7.24791e-10
GNPNAT1	0.587449	6.49547	7.83314e-10
COL6A3	-0.861113	-6.49369	7.90843e-10
C3orf14	-0.564086	-6.49044	8.04758e-10
SPC25	0.677693	6.48832	8.13994e-10
NXN	-0.820302	-6.48403	8.32999e-10
PCDH7	-0.889771	-6.48136	8.45027e-10
BCL6B	-0.445165	-6.47618	8.68882e-10
TIMM13	0.50096	6.47236	8.86874e-10
UNG	0.52151	6.47065	8.95045e-10
RACGAP1	0.602731	6.45852	9.55247e-10
DTX3	-0.579566	-6.45263	9.8593e-10
MAP7	0.761572	6.45022	9.98744e-10
ARHGAP30	-0.817707	-6.44512	1.02638e-09
ZNF423	-0.708451	-6.44314	1.03734e-09
SCARF2	-0.523872	-6.44176	1.04503e-09
MEF2C	-0.935903	-6.4376	1.06856e-09
COL14A1	-0.978059	-6.4368	1.07313e-09
RASGRP2	-0.66863	-6.43087	1.10776e-09
CEBPG	0.657467	6.43066	1.10898e-09
CPE	-0.981834	-6.42972	1.11455e-09
MYL9	-1.06481	-6.42303	1.15515e-09
MRPL48	0.472323	6.42237	1.15924e-09
FAM107A	-0.642864	-6.4218	1.16277e-09
GMNN	0.696274	6.40314	1.28458e-09
LMNB1	0.734532	6.40079	1.3008e-09
SYAP1	0.496536	6.39986	1.30726e-09
C5AR1	-0.768303	-6.39962	1.30896e-09
FAM49A	-0.647441	-6.39764	1.32287e-09
VEGFC	-0.577125	-6.39282	1.3573e-09
FEN1	0.590452	6.36642	1.56213e-09
MELK	0.91791	6.36641	1.56219e-09
ST6GALNAC5	-0.828951	-6.36004	1.61601e-09
ADAM19	-0.780636	-6.35896	1.62534e-09
PXMP2	0.493437	6.35497	1.66019e-09
RRM2	0.882581	6.34347	1.76469e-09
PDSS1	0.776091	6.33407	1.85489e-09
C10orf10	-0.858613	-6.32438	1.95258e-09
FH	0.565063	6.32428	1.95364e-09
SPARCL1	-0.884043	-6.32294	1.96757e-09
ARL4C	-0.908876	-6.32264	1.97066e-09
SCUBE2	-0.667699	-6.32224	1.97489e-09
GALNT3	0.800075	6.32058	1.99235e-09
GLIS2	-0.699699	-6.31853	2.01411e-09
PSAT1	1.04083	6.31224	2.08222e-09
HOOK1	0.734898	6.3061	2.15101e-09
GNG11	-0.727788	-6.30316	2.18471e-09
PLA2G5	-0.648527	-6.29727	2.2538e-09
POPDC2	-0.649707	-6.29488	2.28244e-09
NRP1	-0.812183	-6.29129	2.32609e-09
FLNA	-0.877977	-6.29087	2.33117e-09
TNFSF13B	-0.961259	-6.28954	2.34764e-09
F2RL1	0.822186	6.28946	2.34869e-09
SASH3	-0.817357	-6.28544	2.39908e-09
TRPV2	-0.554017	-6.26573	2.6617e-09
CDC6	0.886506	6.26566	2.6628e-09
ZNF365	-0.425812	-6.25979	2.74637e-09
HCK	-0.733186	-6.25382	2.83399e-09
GNB4	-0.780514	-6.25342	2.83992e-09
NFASC	-0.552749	-6.24697	2.93791e-09
CHEK1	0.756553	6.24191	3.01715e-09
LUM	-1.0643	-6.23846	3.07237e-09
RASSF2	-0.846425	-6.23745	3.08869e-09
CLIC6	-0.686108	-6.23111	3.19323e-09
ASB2	-0.648732	-6.23102	3.19485e-09
EFHA2	-0.429823	-6.2283	3.24071e-09
SLIT2	-0.86228	-6.21772	3.42578e-09
PDGFC	-0.900261	-6.20972	3.57233e-09
LILRB2	-0.831177	-6.20464	3.66868e-09
CDH11	-0.935459	-6.20402	3.68064e-09
DEPDC1	0.781809	6.20225	3.71498e-09
C1QA	-0.914487	-6.19782	3.80216e-09
CASP6	0.54658	6.19773	3.8039e-09
PLAT	-0.93743	-6.18732	4.01664e-09
ENG	-0.547591	-6.17968	4.18035e-09
TK1	0.666786	6.17786	4.22036e-09
CRISPLD2	-0.765215	-6.1776	4.22593e-09
APBB1	-0.42384	-6.17602	4.26103e-09
SYT11	-0.58104	-6.17449	4.29514e-09
TRAF1	-0.5972	-6.17446	4.29589e-09
TMEM48	0.65584	6.17245	4.34126e-09
ZNF512B	-0.587998	-6.1705	4.38566e-09
SLC9A9	-0.492181	-6.16782	4.44748e-09
SMARCD3	-0.541827	-6.16564	4.49827e-09
NLRP1	-0.558237	-6.15995	4.6338e-09
ARHGAP25	-0.671518	-6.15731	4.698e-09
TMEM97	0.763876	6.14668	4.9656e-09
CENPA	0.758016	6.14353	5.0476e-09
DOK2	-0.540333	-6.14231	5.07973e-09
IGFBP5	-1.01496	-6.14006	5.13949e-09
VRK1	0.613447	6.13977	5.14727e-09
WBSCR17	-0.58481	-6.13809	5.19249e-09
BCAT1	-0.923509	-6.12976	5.42245e-09
THY1	-0.73137	-6.12428	5.579e-09
NOTCH4	-0.413472	-6.12356	5.59986e-09
KIAA1804	0.486051	6.12079	5.68113e-09
CPXM1	-0.616426	-6.10134	6.28431e-09
HSPB6	-0.931624	-6.09505	6.49278e-09
MKI67	0.682609	6.08868	6.71059e-09
PRC1	0.639776	6.08808	6.73126e-09
PPM1M	-0.442683	-6.08552	6.82124e-09
CHST2	-0.52869	-6.08141	6.96766e-09
APOO	0.494466	6.08038	7.00512e-09
AR	-0.499512	-6.07999	7.01917e-09
RECK	-0.707138	-6.07643	7.14941e-09
LGALS1	-0.724399	-6.07641	7.15016e-09
SNED1	-0.552873	-6.06912	7.42487e-09
ACTL6A	0.518951	6.06624	7.53634e-09
THBS2	-1.17971	-6.06532	7.57202e-09
RASSF5	-0.650016	-6.06352	7.64289e-09
CKS2	0.867926	6.05833	7.85028e-09
SDC2	-0.8359	-6.05647	7.9262e-09
AP1S2	-0.620454	-6.05572	7.95672e-09
HAVCR2	-0.742218	-6.0467	8.33565e-09
DCLRE1A	0.520501	6.04503	8.40781e-09
FBXO5	0.625819	6.04259	8.51395e-09
CTGF	-1.06211	-6.04195	8.54233e-09
IGFBP4	-0.701488	-6.03775	8.72891e-09
CASC5	0.619612	6.0369	8.76723e-09
SRPX2	-0.769279	-6.02991	9.08856e-09
TRIP13	0.634511	6.02342	9.39735e-09
PCOLCE	-0.645364	-6.01548	9.78865e-09
CLDN7	0.530321	6.01342	9.89288e-09
C6orf211	0.573966	6.01121	1.0006e-08
ADAM8	-0.569149	-6.00772	1.01871e-08
FLI1	-0.539356	-6.00688	1.02307e-08
TLR1	-0.668415	-6.00116	1.05358e-08
SUCLG1	0.531937	6.00086	1.05518e-08
ADORA3	-0.803713	-6.00016	1.05901e-08
CHAF1B	0.55469	5.99736	1.07434e-08
PMM2	0.45264	5.99681	1.07735e-08
OSMR	-0.772486	-5.99219	1.1032e-08
PDE1A	-0.633126	-5.98821	1.12592e-08
C4orf19	0.83973	5.9802	1.17306e-08
DIAPH3	0.740392	5.97679	1.19376e-08
FN1	-1.22623	-5.97537	1.20245e-08
GIMAP1	-0.556322	-5.9731	1.21651e-08
ELN	-0.959777	-5.97298	1.21724e-08
PLK4	0.597346	5.96937	1.23993e-08
ARHGAP9	-0.667074	-5.96346	1.27796e-08
KCNJ8	-0.494139	-5.96301	1.2809e-08
IL10RA	-0.817138	-5.95327	1.34625e-08
PAICS	0.647683	5.95299	1.34818e-08
ZNF532	-0.684272	-5.93937	1.44523e-08
COQ3	0.446078	5.93464	1.48048e-08
POF1B	0.94207	5.93163	1.50338e-08
MRPL3	0.634869	5.92634	1.5444e-08
LSM4	0.401128	5.91285	1.65411e-08
APOE	-1.0131	-5.91249	1.65719e-08
KLF2	-0.591191	-5.90921	1.68501e-08
ELOVL6	0.800014	5.89897	1.77495e-08
VDAC2	0.426491	5.8905	1.85297e-08
CCNB1	0.815286	5.88882	1.86882e-08
GUCY1A3	-0.856074	-5.88687	1.88739e-08
SH3BP5	-0.612805	-5.88575	1.89815e-08
CEP55	0.719173	5.8802	1.95223e-08
SERPINE1	-0.947309	-5.87876	1.96651e-08
GAL3ST4	-0.627151	-5.87781	1.97609e-08
AGR2	1.07038	5.87573	1.99699e-08
AFAP1L1	-0.394016	-5.87213	2.03366e-08
LSP1	-0.68861	-5.87156	2.03958e-08
SPSB1	-0.575306	-5.8715	2.04023e-08
ETFA	0.508063	5.86855	2.07085e-08
LTBP1	-0.977099	-5.86705	2.08669e-08
LAPTM5	-0.826622	-5.8576	2.18886e-08
GJA4	-0.566479	-5.85397	2.2293e-08
SLA	-0.713415	-5.84624	2.31806e-08
DSG2	0.743351	5.8449	2.33388e-08
PPP1R16B	-0.547079	-5.84272	2.35964e-08
FGL2	-0.965086	-5.84045	2.3868e-08
TIMP3	-0.932785	-5.83509	2.45217e-08
MGST1	0.946884	5.82988	2.51743e-08
EMILIN1	-0.649377	-5.82879	2.53135e-08
DEPDC1B	0.629691	5.82337	2.60145e-08
GIMAP6	-0.684816	-5.8165	2.69295e-08
THBD	-0.64846	-5.81575	2.7031e-08
NUSAP1	0.70467	5.80925	2.79298e-08
FZD7	-0.832944	-5.80661	2.83027e-08
RFC4	0.544213	5.80152	2.90365e-08
EXO1	0.509921	5.7848	3.15778e-08
STX11	-0.532871	-5.77694	3.28474e-08
RHOJ	-0.622293	-5.77158	3.3741e-08
KLHDC8B	-0.623707	-5.77091	3.38538e-08
SIRPA	-0.619089	-5.76837	3.42879e-08
COL4A2	-0.735425	-5.7658	3.47319e-08
POLR2H	0.394329	5.76547	3.47883e-08
FOXO1	-0.598477	-5.76486	3.48945e-08
HEG1	-0.612184	-5.76372	3.50947e-08
MS4A6A	-0.854194	-5.76255	3.53016e-08
DLG3	0.549503	5.76089	3.55956e-08
PREX1	-0.545234	-5.758	3.61139e-08
CYP2J2	0.680493	5.74799	3.79652e-08
PIK3R5	-0.486437	-5.74604	3.83377e-08
NCAPD2	0.514349	5.74279	3.89649e-08
ODC1	0.618495	5.74277	3.89677e-08
C7	-1.17034	-5.74186	3.91449e-08
ARHGAP15	-0.614568	-5.73775	3.99562e-08
ADAMTS1	-0.703983	-5.73703	4.01014e-08
MCAT	0.395898	5.73668	4.01708e-08
NAB2	-0.52148	-5.73333	4.08465e-08
MAP3K3	-0.411234	-5.72338	4.29248e-08
RCAN2	-0.604816	-5.72328	4.29449e-08
PAPLN	-0.621	-5.72139	4.33523e-08
TNFRSF11A	0.935384	5.71153	4.55328e-08
PLA1A	-0.966777	-5.71003	4.58733e-08
KIF14	0.632305	5.70247	4.76291e-08
BIRC5	0.537649	5.70093	4.79965e-08
C1orf54	-0.459989	-5.70047	4.81063e-08
IMMP1L	0.530448	5.69796	4.87091e-08
CD248	-0.774274	-5.69529	4.936e-08
ADAMTS2	-0.778093	-5.69494	4.94437e-08
C1orf162	-0.731856	-5.69313	4.98903e-08
