# Supplementary material for: BRAF V600E Mutant Colorectal Cancer Subtypes Based on Gene Expression
Source: Oxford University Press journal article supplement (doi:10.1158/1078-0432.ccr-16-0140), 2016-06-29
Supplement: 10780432ccr160140-sup-161056_1_supp_3477678_h6n7hn.xlsx [file 10780432ccr160140-sup-161056_1_supp_3477678_h6n7hn.xlsx]

## Sheet: Table S6
	Table S6. Classification of CRC cell lines into BM subtypes
	Legend
	Table showing the BRAF mutant classification of CRC cell lines from Sanger, CCLE and GSK databases. BM1 cell lines are highlighted in red while BM2 in blue. If a cell lines was found called from the same subtype across several databases, it was defined as consistently classified and thus kept for drug response analyses.
							Consistent across datasets?
		CCLE	SANGER	GSK
	Cell line	BM subtypes							Summary
	COLO.320	BM2	BM1	BM2			No		BM1	BM2
	HCT.15	BM2	BM2	BM2			Yes		SW1417	HCT.15
	LS1034	BM2	BM2	BM2			Yes		C2BBe1	LS1034
	NCI.H716	BM2	BM2	BM1			No			SW1116
	NCI.H747	BM2	BM2	BM1			No			RKO
	SW1116	BM2	BM2	BM2			Yes			SW48
	SW1417	BM1	BM1	BM1			Yes			SW837
	RKO	BM2	BM2	BM2			Yes
	SW48	BM2	BM2	BM2			Yes
	SW620	BM2	BM2	BM1	BM2		No
	SW837	BM2	BM2	BM2			Yes
	SW948	BM2	BM2	BM1	BM2		No
	C2BBe1	BM1	BM1				Yes
	COLO.678	BM2	BM1				No
	CCK.81	BM2	BM1				No
	COLO.205	BM2	BM2				Yes
	CW.2	BM2	BM2				Yes
	HCT.116	BM2	BM2				Yes
	HT.29	BM2	BM2				Yes
	HT55	BM2	BM2				Yes
	KM12	BM2	BM2				Yes
	LoVo	BM2	BM2				Yes
	LS123	BM1	BM2				No
	LS411N	BM2	BM2				Yes
	RCM.1	BM2	BM2				Yes
	LS513	BM2	BM2				Yes
	SK.CO.1	BM2	BM2				Yes
	SNU.C1	BM2	BM2				Yes
	SW1463	BM2	BM2				Yes
	MDST8	BM1		BM2			No
	NCI.H508	BM2		BM2			Yes
	HCT.8	BM2		BM2			Yes
	COLO.201	BM2		BM2			Yes
	SW403	BM2		BM2			Yes
	SW480	BM1		BM2			No
	T84		BM2	BM2			Yes
	CL.11	BM2
	CL.14	BM2
	CL.34	BM2
	CL.40	BM2
	DLD.1	BM2
	GP2d	BM2
	HCC.56	BM2
	Hs.255.T	BM1
	Hs.675.T	BM1
	Hs.698.T	BM1
	HT115	BM2
	LS.180	BM2
	SNU.C2A	BM2
	OUMS.23	BM1
	SNU.1033	BM2
	SNU.1040	BM2
	SNU.1197	BM1
	SNU.175	BM2
	SNU.283	BM2
	SNU.407	BM2
	SNU.503	BM1
	SNU.61	BM2
	SNU.81	BM2
	SNU.C4	BM2
	SNU.C5	BM2
	CaR.1		BM2
	GP5d		BM2
	HCC2998		BM2
	NCI.H630		BM2
	SNU.C2B		BM2
	WIDR			BM2
